# Supplementary material for: 1D hetero-bimetallic regularly alternated 4f–3d coordination polymers based onN-oxide-4,4′-bipyridine (bipyMO) as a linker: photoluminescence and magnetic properties
Source: Royal Society of Chemistry journal article supplement (doi:10.1039/c8dt00880a), 2018-01-01
Supplement: c8dt00880a1.pdf [file c8dt00880a1.pdf]

Revised version

## Electronic Supporting Information

### 1D hetero-bimetallic 4*f*-3*d* coordination polymers based on *N*-oxide-4,4'-bipyridine (bipyMO) as linker: photoluminescent and magnetic properties

Lidia Armelao,<sup>§†</sup> Daniela Belli Dell'Amico,<sup>‡</sup> Gregorio Bottaro,<sup>§†</sup> Luca Bellucci,<sup>§</sup> Luca Labella,<sup>‡\*</sup> Fabio Marchetti,<sup>‡</sup> Carlo Andrea Mattei,<sup>‡</sup> Federica Mian,<sup>§†</sup> Francesco Pineider,<sup>‡</sup> Giordano Poneti<sup>#</sup> and Simona Samaritani<sup>‡</sup>

<sup>§</sup>*Dipartimento di Scienze Chimiche, Università di Padova, via Marzolo 1, I-35131*

<sup>†</sup>*CNR ICMATE and INSTM, Dipartimento di Scienze Chimiche, Università di Padova, via Marzolo 1, I-35131*

<sup>‡</sup>*Dipartimento di Chimica e Chimica Industriale and CIRCC, Università di Pisa, via Giuseppe Moruzzi 13, I-56124*

<sup>#</sup>*Instituto de Química, Universidade Federal do Rio de Janeiro, Avenida Athos da Silveira Ramos, 149, Centro de Tecnologia – Cidade Universitária, 21941-909, Rio de Janeiro, Brazil*

\*Corresponding author: (e-mail : [luca.labella@unipi.it](mailto:luca.labella@unipi.it))

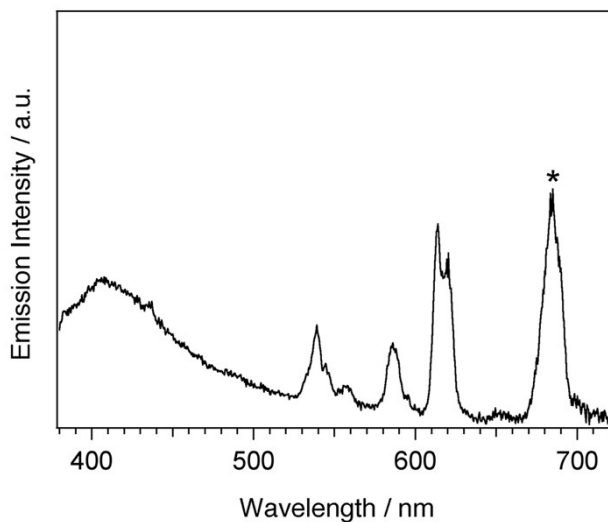

**Figure S1.** Emission spectrum of **1** excited at 350 nm. The (\*) signal is due to second-order diffraction of excitation wavelength.

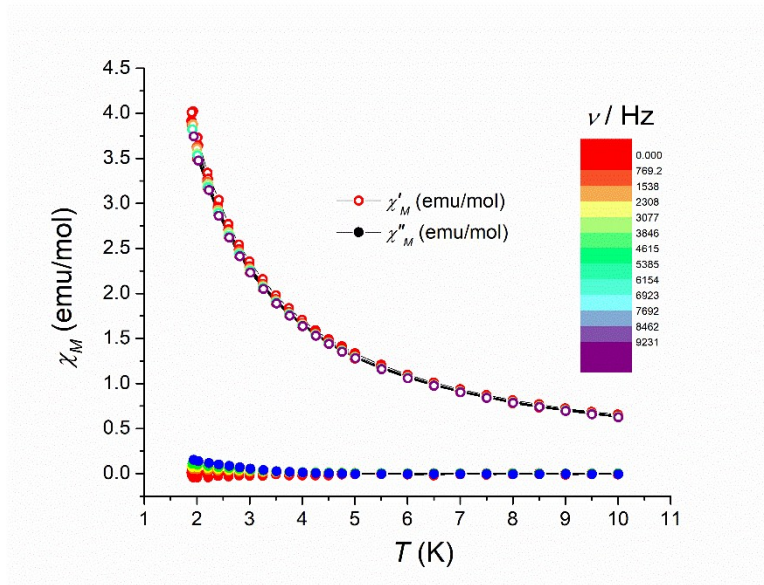

**Figure S2.** Temperature dependence of the in-phase (empty circles) and out-of-phase (full circles) molar magnetic susceptibilities of **3** for 10 frequencies logarithmically spanning the  $10 - 10^4$  Hz range at zero static applied field. Lines are guide to the eye.

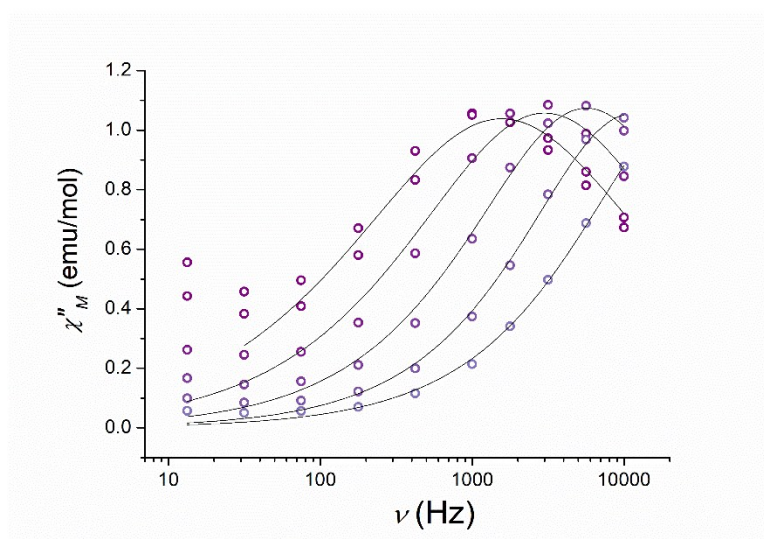

**Figure S3.** Frequency dependence of the out-of-phase molar magnetic susceptibility of **3** in 0.1 T static applied field in the 1.9 – 3.0 K interval. Lines are the results of the best fitting procedure with the extended Debye model described in the Experimental Section.

**Table S1.** Parameters obtained from the best fitting procedure of  $\chi''_M(\nu)$  of **3** in 1000 Oe field, using the extended Debye model, as described in the main text. Data within parentheses arise from the best fitting procedure of the Cole-Cole plots reported in Figure S5.

| $T$ (K) | $\chi_T - \chi_S$ (emu/mol) | Error (emu/mol) | $\tau$ ( $\mu$ s) | Error ( $\mu$ s) | $\alpha$          | Error   | $R^2$   |
|---------|-----------------------------|-----------------|-------------------|------------------|-------------------|---------|---------|
| 1.9     | 4.04482 (4.1236)            | 0.06896         | 127.95021         | 4.0998           | 0.39153 (0.40555) | 0.01177 | 0.99098 |
| 2       | 3.82023 (3.84092)           | 0.0663          | 100.27293         | 3.26895          | 0.35695 (0.3632)  | 0.01228 | 0.99274 |
| 2.2     | 3.43445 (3.41416)           | 0.08332         | 55.26999          | 2.37266          | 0.28181 (0.28187) | 0.01744 | 0.99362 |
| 2.4     | 3.35478 (2.94115)           | 0.29563         | 28.10742          | 4.81425          | 0.27499 (0.18635) | 0.05385 | 0.97516 |
| 2.6     | 3.05512 (2.86513)           | 0.38362         | 14.24272          | 3.50916          | 0.23109 (0.1912)  | 0.05707 | 0.98768 |
| 2.8     | 3.33334                     | 0.95064         | 5.37884           | 3.06873          | 0.25945           | 0.0616  | 0.99326 |

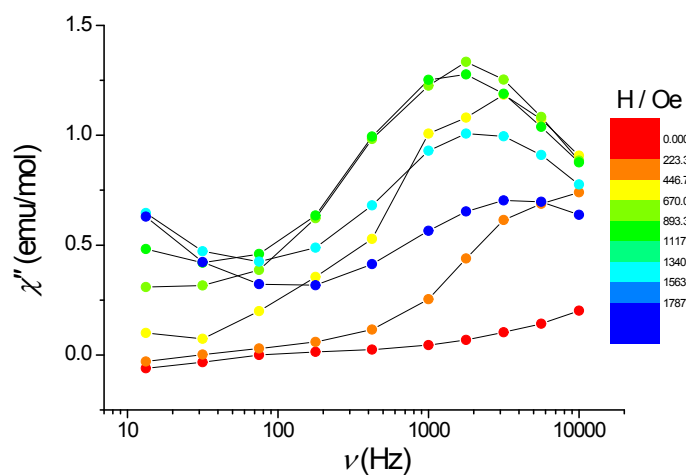

**Figure S4.** Field dependence of the out-of-phase molar magnetic susceptibility of **3** at 2.0 K. Lines are guide to the eye.

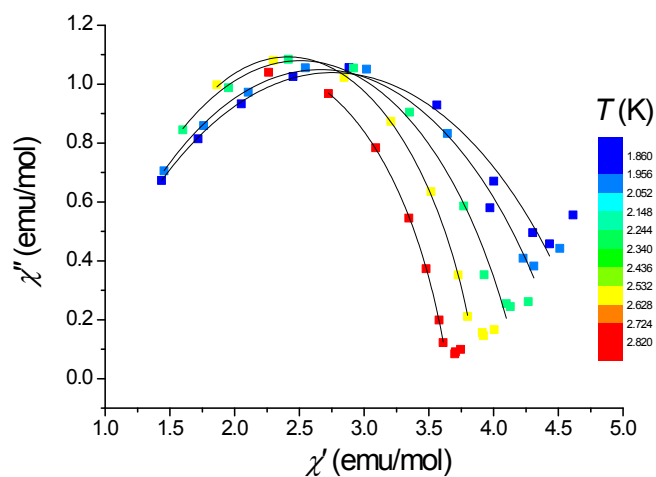

**Figure S5.** Cole-Cole plot measured for **3** in a 1000 Oe magnetic field. Lines are results of the best fitting procedure using the extended Debye model. The determined values of  $\chi_T - \chi_S$  and of the  $\alpha$  parameters have been plotted in Table S1 between parenthesis, next to the corresponding values arising from the best fitting results of the  $\chi''(\nu)$  isothermal profiles reported in Figure S3.
